# Supplementary material for: TIFAB Regulates USP15-Mediated p53 Signaling during Stressed and Malignant Hematopoiesis
Source: PubMed Central journal article supplement — Cell Rep. Author manuscript; Available in PMC 2020 Jul 27. (PMC7384867; doi:10.1016/j.celrep.2020.01.093), 2020-02-25
Supplement: NIHMS1566846-supplement-1.pdf [file NIHMS1566846-supplement-1.pdf]

**Cell Reports, Volume 30**

**Supplemental Information**

**TIFAB Regulates USP15-Mediated p53 Signaling  
during Stressed and Malignant Hematopoiesis**

**Madeline Niederkorn, Kathleen Hueneman, Kwangmin Choi, Melinda E. Varney, Laurel Romano, Mario A. Pujato, Kenneth D. Greis, Jun-ichiro Inoue, Ruhikanta Meetei, and Daniel T. Starczynowski**

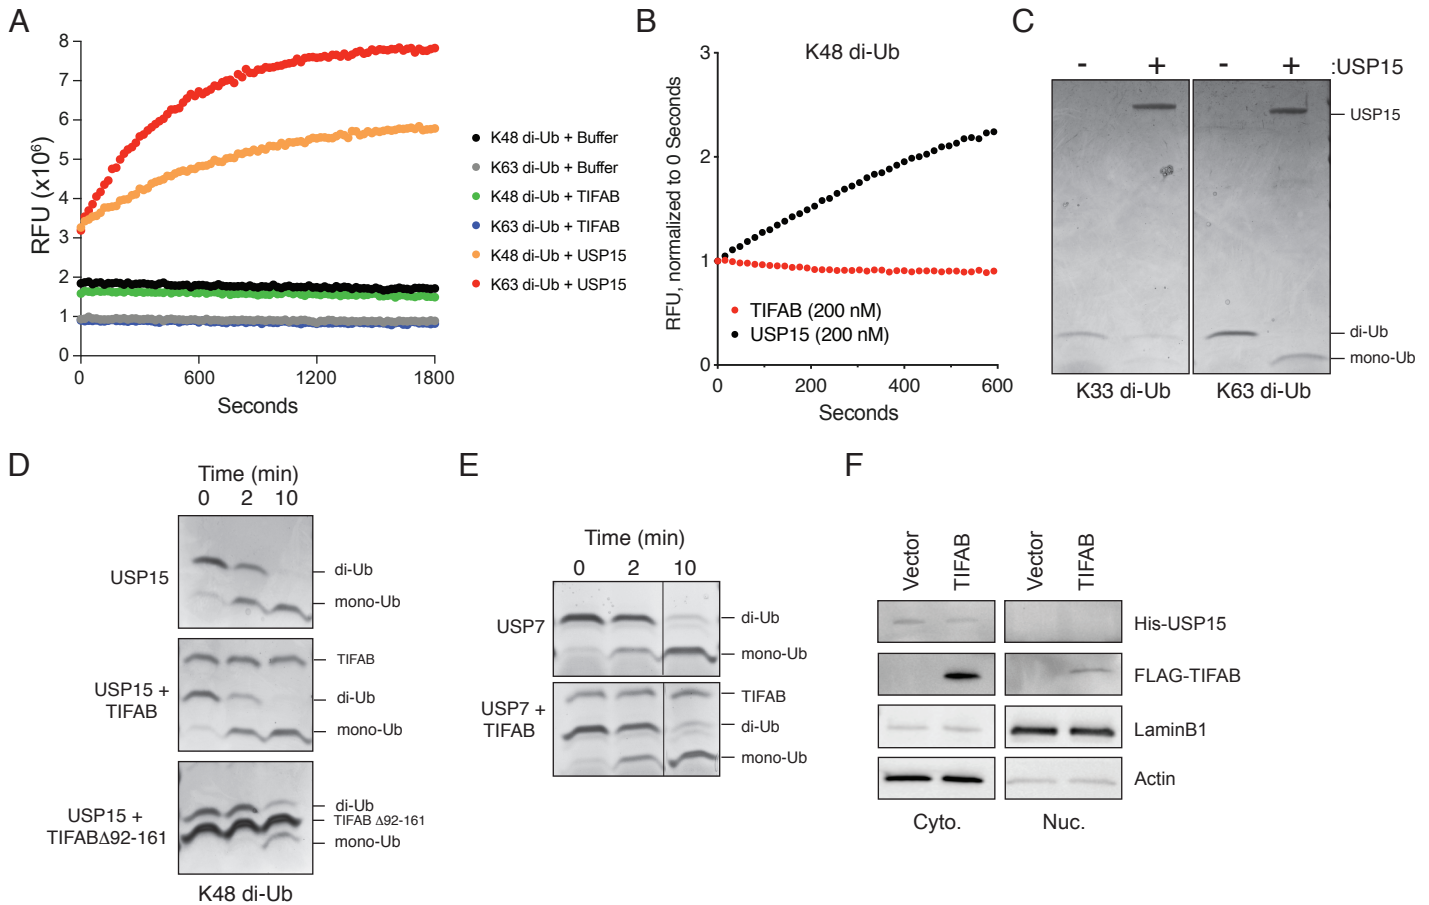

**Figure S1. TIFAB lacks intrinsic catalytic activity and its effects in deubiquitination assays are specific to USP15 (related to Figure 2).** (A) Relative fluorescence units (RFU) measured over time for IQF K48 and K63 linked di-ubiquitin (di-Ub) alone, with the addition of TIFAB eluate isolated from HL60-TIFAB lysate, or USP15. As a control, di-Ub alone or with TIFAB were evaluated. (B) Relative fluorescence generated by 200 nM of recombinant TIFAB (red) or 200 nM of recombinant USP15 (black) incubated with 200 nM IQF-K48 di-Ub substrates. (C) Coomassie-stained gel of di-ubiquitin hydrolysis reactions for 30 min in the absence or presence of USP15 enzyme. K33 di-Ub (left) and K63 di-Ub (right) were used as the substrate. (D) Coomassie-stained gel of di-Ub hydrolysis reactions at the indicated times with USP15 alone, USP15 with full-length recombinant TIFAB, and USP15 with a C-terminal deletion mutant of TIFAB. (E) Coomassie-stained gel of di-Ub hydrolysis reactions at the indicated times with USP7 alone, and USP7 with full-length recombinant TIFAB. (F) Immunoblotting of His-USP15 and FLAG-TIFAB in cytoplasmic and nuclear fractions of transfected HEK293 cells.

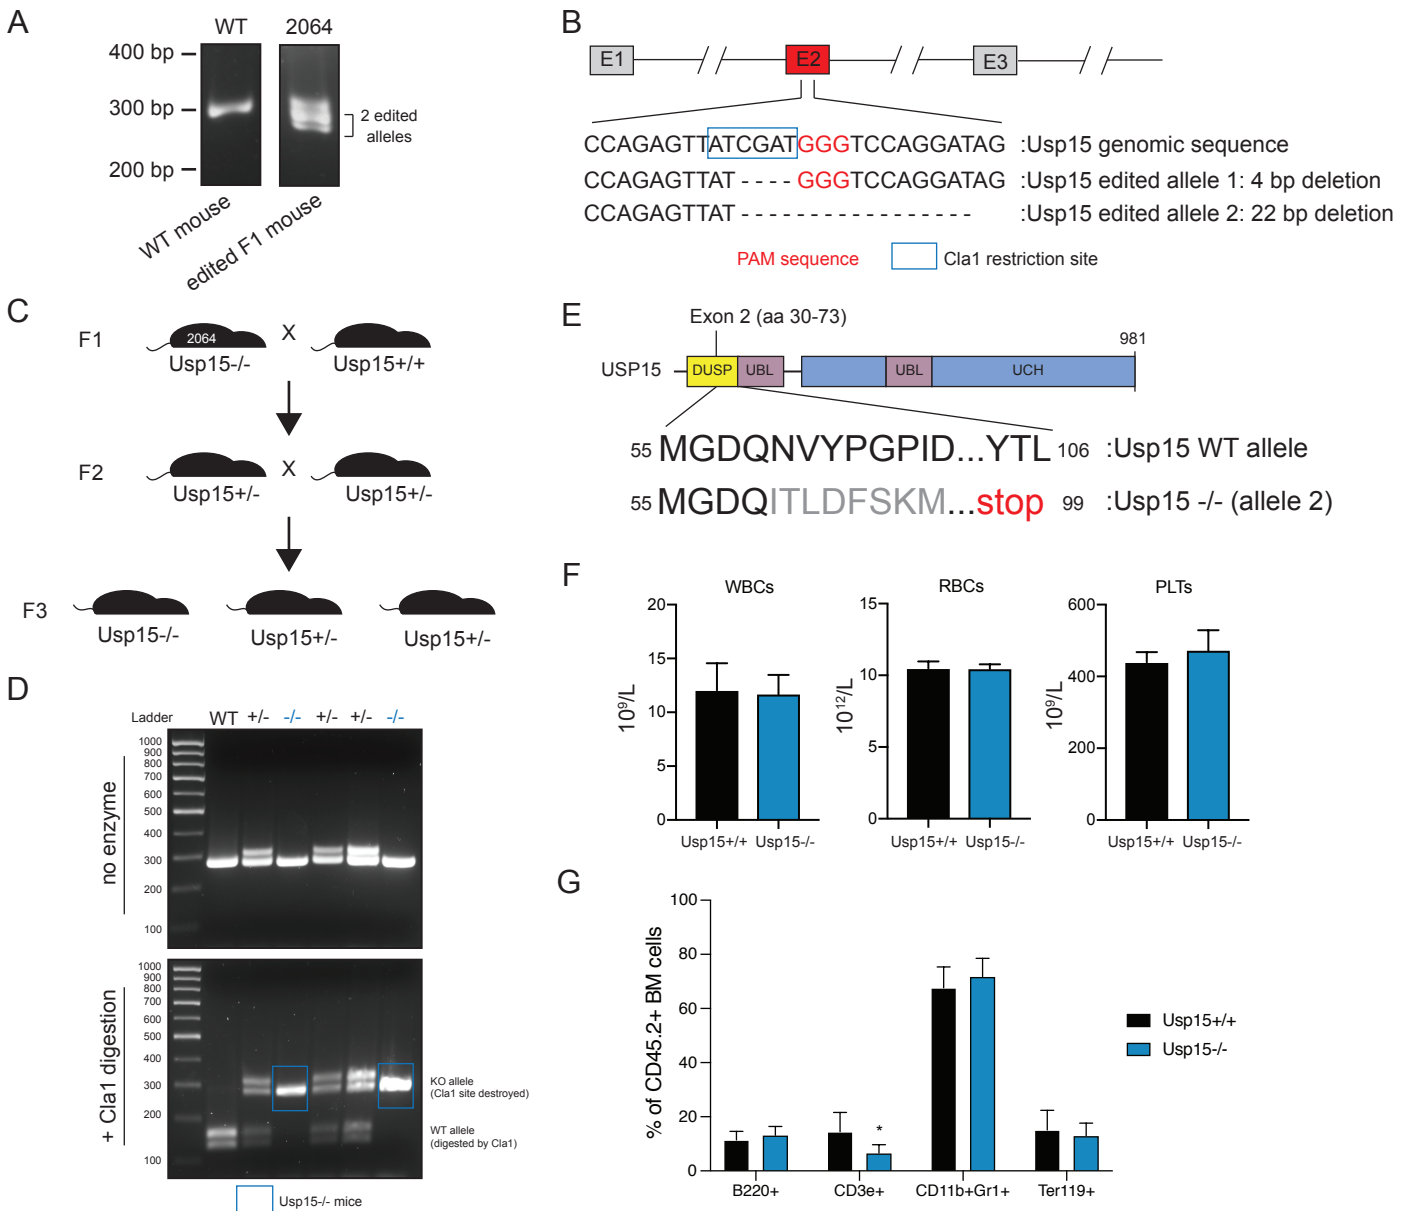

**Figure S2. Generation of USP15 knockout mice (related to Figure 3).** (A) DNA gel image of PCR amplification of the *Usp15* locus in a WT control mouse and in an F1 mouse that was microinjected with a *Usp15*-targeted CRISPR-CAS9-guideRNA complex. Microinjection of mouse 2064 generated two modified alleles. (B) Schematic of *Usp15* exon structure and gene targeting strategy. Guide RNAs were targeted to exon 2 of the *Usp15* locus. Genomic sequence of Exon 2 for WT *Usp15* and the two edited allele in F1 mouse 2064 is shown below. The PAM sequence directing the guide RNA activity is shown in red. Dashes represent identified 4 base-pair and 22 base-pair deletions in each respective allele. A *Cla*I restriction enzyme site is present in the WT genetic sequence (blue box), but is destroyed in each edited allele. (C) Schematic of *Usp15* knockout breeding strategy. The F1 mouse (2064) was crossed to a WT C57/Bl6 mouse to generate F2 heterozygous mice containing only one modified allele. Heterozygous mice were sequenced for *Usp15* and mice with the identical modified allele were crossed to each other to generate homozygous edited mice (*Usp15*<sup>-/-</sup>). (D) Genotyping gel images of PCR amplification of *Usp15* exon 2 for a litter from an F2 cross. To distinguish between WT and *Usp15*<sup>-/-</sup> mice, *Cla*I digestion was performed. Genomic DNA from WT mice will result in digestion with *Cla*I (2 bands below 200 bp). Genomic DNA from *Usp15*<sup>-/-</sup> mice is resistant to digestion with *Cla*I resulting in 300 bp amplicon. (E) Schematic of full-length *Usp15* protein, indicating the location of exon 2 and the predicted amino acid sequence of *Usp15*<sup>-/-</sup> mice (edited at allele 2), which will generate an N-terminal truncated protein. (F) Complete blood counts at 6 weeks post-transplant of lethally irradiated mice reconstituted with BM from *Usp15*<sup>+/+</sup> and *Usp15*<sup>-/-</sup> mice. (G) Flow cytometry analysis of the indicated BM populations of lethally irradiated mice reconstituted with BM from *Usp15*<sup>+/+</sup> and *Usp15*<sup>-/-</sup> mice (n = 15 per group). Error bars represent S.E.M. \*, P < 0.05.

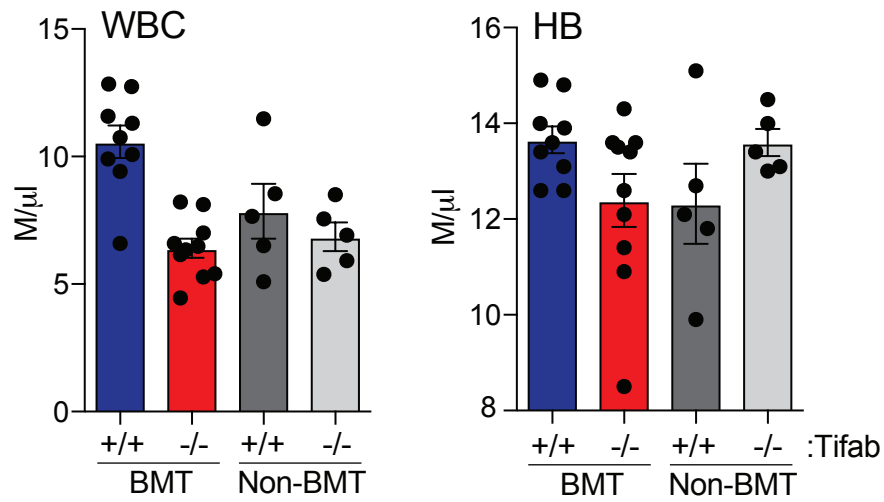

**Figure S3. Transplantation of Tifab-deficient BM results in ineffective hematopoiesis (related to Figure 4).** Blood counts were performed at ~6 months post-BM transplantation of Tifab<sup>+/+</sup> or Tifab<sup>-/-</sup> BM cells into lethally-irradiated recipient mice. For non-transplanted mice, blood counts were performed at ~6 months of age. WBC, white blood cells; HB, hemoglobin.

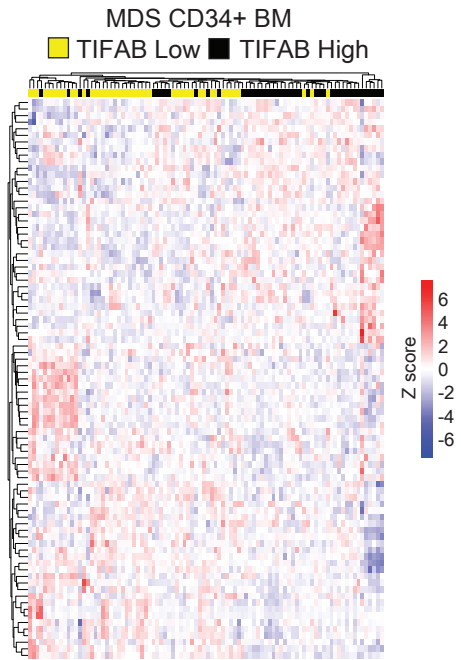

**Figure S4. Differential gene expression in MDS CD34+ cells stratified based on TIFAB expression (related to Figure 4).** Unsupervised hierarchical clustering and heat map showing expression differences of p53 target genes in MDS CD34+ BM cells (n = 183) stratified based on TIFAB high (top quartile) and TIFAB low (bottom quartile) expression (Pellagatti et al., Leukemia, 2010).

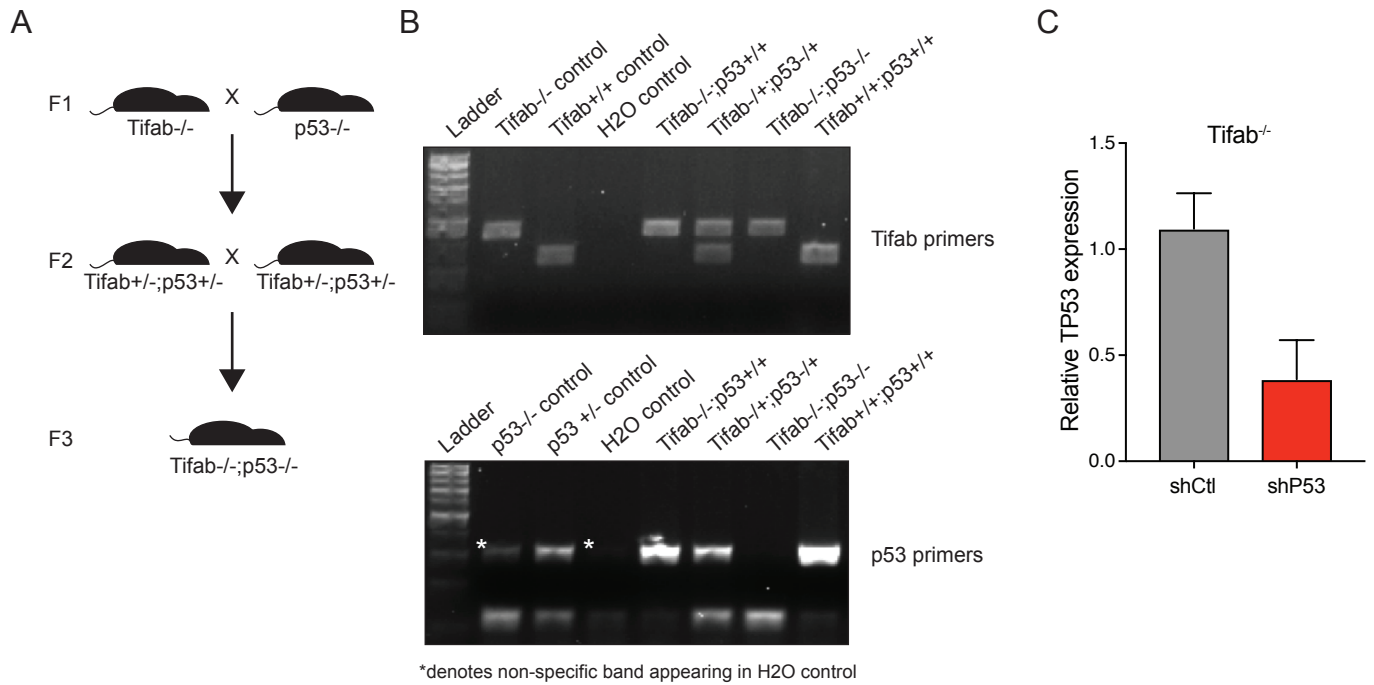

**Figure S5. Generation of a  $Tifab^{-/-};p53^{-/-}$  double knockout mouse model (related to Figure 4).** (A) Breeding strategy to generate  $Tifab^{-/-};p53^{-/-}$  mice. (B) Genotyping images for the *Tifab* locus (top gel) and the *p53* locus (bottom gel) in the indicated mice, confirming deletion of *Tifab* and *p53*. (C) Relative TP53 mRNA expression in  $Tifab^{-/-}$  BM LK cells transduced with lentiviral vectors encoding control shRNA (shCtl) or shRNAs targeting *p53* (shP53).

A

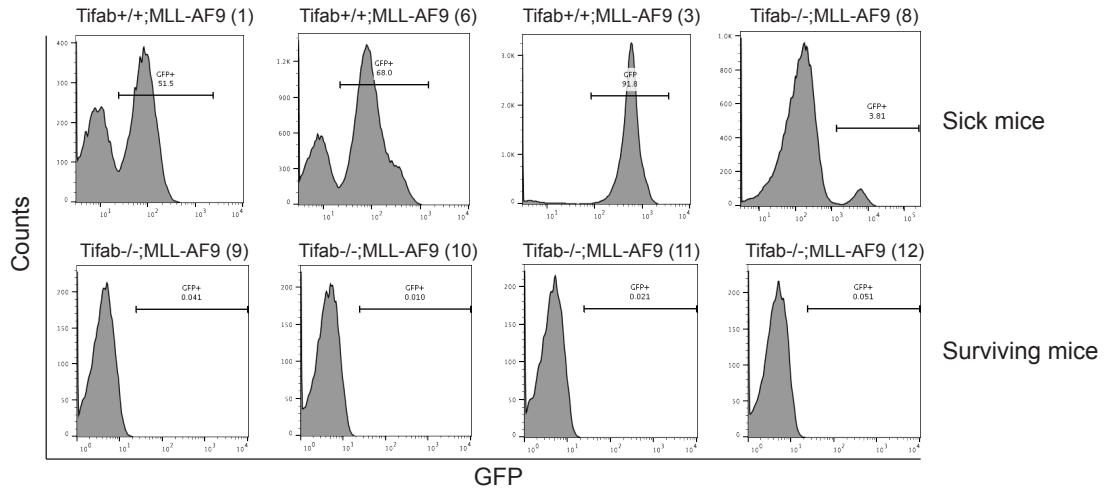

B

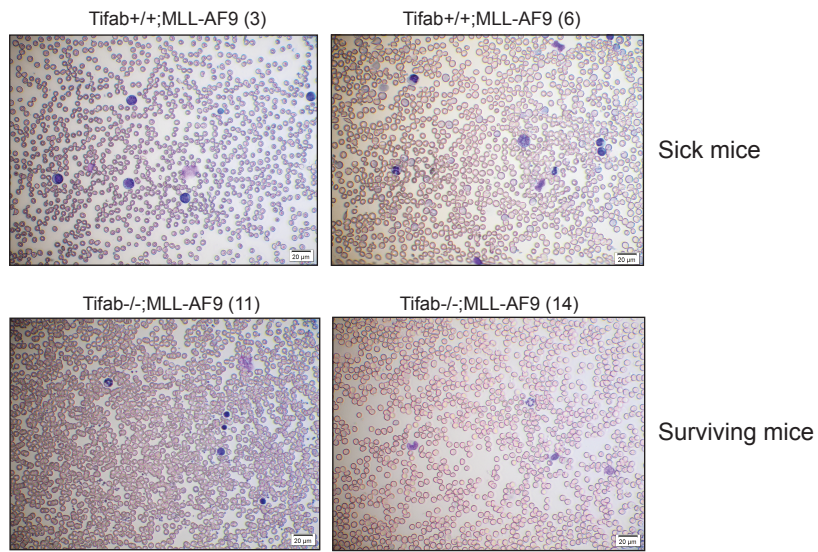

**Figure S6. Peripheral blood analysis of Tifab<sup>+/+</sup>;MLL-AF9 and Tifab<sup>-/-</sup>;MLL-AF9 transplanted mice (related to Figure 6).** (A) FACS histogram plots on PB mononuclear cells from sick (top row) and surviving (bottom row) mice that were transplanted with Tifab<sup>+/+</sup>;MLL-AF9 (GFP<sup>+</sup>) or Tifab<sup>-/-</sup>;MLL-AF9 (GFP<sup>+</sup>) cells. Bars indicate percent GFP<sup>+</sup> cells in the PB. All mice transplanted with Tifab<sup>+/+</sup>;MLL-AF9 BM cells developed AML, while only one mouse transplanted with Tifab<sup>-/-</sup>;MLL-AF9 BM cells (mouse #8) developed AML. (B) Wright-Giemsa stained PB smears from two representative sick mice transplanted with Tifab<sup>+/+</sup>;MLL-AF9 BM cells (mouse #3 and #6) and two representative surviving mice transplanted with Tifab<sup>-/-</sup>;MLL-AF9 BM cells (mouse #11 and #14). The Tifab<sup>+/+</sup>;MLL-AF9 sick mice show evidence of myeloid blasts, indicated by larger, round white blood cells with a high nuclear to cytoplasmic ratio.

**Table S1. TIFAB interactome analysis by mass spectrometry (related to Figure 1)**

| Rank | Protein  | AVG Precursor Intensity | Rank | Protein      | AVG Precursor Intensity | Rank | Protein | AVG Precursor Intensity | Rank | Protein  | AVG Precursor Intensity |
|------|----------|-------------------------|------|--------------|-------------------------|------|---------|-------------------------|------|----------|-------------------------|
| 1    | FABP5    | 7.25E+05                | 26   | NEU2         | 2.01E+05                | 51   | AHCYL1  | 9.86E+04                | 76   | DDX17    | 6.34E+04                |
| 2    | LDHA     | 4.38E+05                | 27   | RAB7A        | 1.98E+05                | 52   | ADSL    | 9.31E+04                | 77   | SDHA     | 6.28E+04                |
| 3    | RNH1     | 4.15E+05                | 28   | <b>TIFA</b>  | 1.90E+05                | 53   | SAMHD1  | 9.20E+04                | 78   | ERO1L    | 6.25E+04                |
| 4    | HSPB1    | 4.09E+05                | 29   | GSTP1        | 1.89E+05                | 54   | RPIA    | 8.31E+04                | 79   | SERPINB1 | 6.13E+04                |
| 5    | LMNA     | 3.48E+05                | 30   | SSR4         | 1.88E+05                | 55   | LRPPRC  | 8.31E+04                | 80   | MPO      | 5.99E+04                |
| 6    | ASPRV1   | 3.20E+05                | 31   | DSC2         | 1.81E+05                | 56   | GPS1    | 8.27E+04                | 81   | PSMC1    | 5.98E+04                |
| 7    | EEF1G    | 3.15E+05                | 32   | COPS3        | 1.74E+05                | 57   | ATP2A2  | 8.24E+04                | 82   | PSMD2    | 5.70E+04                |
| 8    | CALM1    | 3.01E+05                | 33   | LGALS3       | 1.65E+05                | 58   | AFG3L2  | 8.11E+04                | 83   | ATP2A1   | 5.64E+04                |
| 9    | CAPZA1   | 3.00E+05                | 34   | PLEC         | 1.60E+05                | 59   | PARK7   | 8.05E+04                | 84   | GEMIN8   | 5.62E+04                |
| 10   | TPM1     | 2.91E+05                | 35   | <b>ANXA2</b> | 1.58E+05                | 60   | CANX    | 7.77E+04                | 85   | CPD      | 5.61E+04                |
| 11   | CALML3   | 2.86E+05                | 36   | NCCRP1       | 1.54E+05                | 61   | RCC2    | 7.64E+04                | 86   | HSPH1    | 5.50E+04                |
| 12   | SLC25A4  | 2.78E+05                | 37   | PPL          | 1.49E+05                | 62   | EIF4B   | 7.48E+04                | 87   | TET2     | 5.12E+04                |
| 13   | PRDX3    | 2.69E+05                | 38   | RCL1         | 1.49E+05                | 63   | DDX3X   | 7.45E+04                | 88   | HADHA    | 5.10E+04                |
| 14   | ANXA1    | 2.67E+05                | 39   | PRDX6        | 1.41E+05                | 64   | LBR     | 7.44E+04                | 89   | LCP1     | 5.09E+04                |
| 15   | TUFM     | 2.57E+05                | 40   | EPPK1        | 1.30E+05                | 65   | G6PD    | 7.27E+04                | 90   | ATP1A1   | 4.96E+04                |
| 16   | COPS4    | 2.53E+05                | 41   | GDI2         | 1.28E+05                | 66   | GSPT1   | 7.05E+04                | 91   | HDAC2    | 4.90E+04                |
| 17   | NME1     | 2.51E+05                | 42   | AZGP1        | 1.24E+05                | 67   | STT3A   | 6.99E+04                | 92   | OGT      | 4.84E+04                |
| 18   | SERPINB8 | 2.50E+05                | 43   | ACTN1        | 1.21E+05                | 68   | CCT6A   | 6.74E+04                | 93   | C22orf28 | 4.60E+04                |
| 19   | STRAP    | 2.41E+05                | 44   | <b>USP15</b> | 1.21E+05                | 69   | CTPS1   | 6.72E+04                | 94   | ATL3     | 4.60E+04                |
| 20   | OLA1     | 2.23E+05                | 45   | DBR1         | 1.13E+05                | 70   | DOCK8   | 6.70E+04                | 95   | FARSA    | 4.59E+04                |
| 21   | TRIM29   | 2.15E+05                | 46   | RAB2A        | 1.05E+05                | 71   | CPT1A   | 6.60E+04                | 96   | SRPR     | 4.54E+04                |
| 22   | SLC25A5  | 2.14E+05                | 47   | PKP3         | 1.03E+05                | 72   | PRKDC   | 6.51E+04                | 97   | UGGT1    | 4.54E+04                |
| 23   | SERPINB5 | 2.08E+05                | 48   | TMX3         | 1.03E+05                | 73   | TRIM28  | 6.48E+04                | 98   | BSG      | 4.53E+04                |
| 24   | YOD1     | 2.03E+05                | 49   | EVPL         | 1.02E+05                | 74   | NSUN2   | 6.41E+04                | 99   | HECTD3   | 4.53E+04                |
| 25   | DDX21    | 2.02E+05                | 50   | PRDX2        | 1.02E+05                | 75   | TFRC    | 6.40E+04                | 100  | AIFM1    | 4.37E+04                |
